# Supplementary material for: Total Soluble Solids in Grape Must Estimation Using VIS-NIR-SWIR Reflectance Measured in Fresh Berries
Source: MDPI journal article supplement (doi:10.3390/agronomy13092275), 2023-08-29
Supplement: s1 [file s1]

Archive with 1 entries (1 files):
- agronomy-2548386-supplementary.pdf
